# Supplementary material
Source: Elsevier journal article supplement (https://www.sciencedirect.com/science/article/pii/S0211563821001139)
Supplement: mmc1 [file S0211563821001139:mmc1.doc]

| **Base de datos** | | **Términos/Cadena de búsqueda** |
| --- | --- | --- |
| **Pubmed** | (("colic"[MeSH Terms] OR "colic"[All Fields] OR ("infant"[All Fields] AND "colic"[All Fields]) OR "infant colic"[All Fields]) AND ("physical therapy modalities"[MeSH Terms] OR ("physical"[All Fields] AND "therapy"[All Fields] AND "modalities"[All Fields]) OR "physical therapy modalities"[All Fields] OR "physiotherapies"[All Fields] OR "physiotherapy"[All Fields])) OR ("musculoskeletal manipulations"[MeSH Terms] OR ("musculoskeletal"[All Fields] AND "manipulations"[All Fields]) OR "musculoskeletal manipulations"[All Fields]) | |
| **PEDro** | "colic" OR "colic" OR ("infant" AND "colic") OR "infant colic" | |
| **Scopus** | "colic" OR "colic" OR ("infant" AND "colic") OR "infant colic" | |

Estrategia de búsqueda.

Material Online 1
