# Supplementary material
Source: Elsevier journal article supplement (https://www.sciencedirect.com/science/article/pii/S0211563821001139)
Supplement: mmc2 [file S0211563821001139:mmc2.doc]

Calidad metodológica según la escala PEDro.

| **Estudios** | **Virpi H.**  **et al.(9)**  **(2000)** | **Fatemah N. et al.**  **(2017)(10)** | [**Samaneh M**](https://www.ncbi.nlm.nih.gov/pubmed/?term=Mansouri%20S%5BAuthor%5D&cauthor=true&cauthor_uid=30532613)**. et al.**  **(2018)(11)** | **Arikan**  **D. et al.**  **(2008)(12)** | **Çetinkaya B. et al.**  **(2012)(13)** | **E. Olafsdottir**  **et al.**  **(2001)(14)** | **Joyce E.**  **et al.**  **(2012)(15)** | **Clive H.**  **et al.**  **(2006)(16)** | **M. Castejón et al.**  **(2019)(17)** | **Sibel I.**  **et al.**  **(2018)(18)** | **Kajsa L.**  **et al.**  **(2010)(19)** | **Holgeir S.**  **et al.**  **(2013)(20)** | **Kajsa L.**  **et al.**  **(2017)(21)** |
| --- | --- | --- | --- | --- | --- | --- | --- | --- | --- | --- | --- | --- | --- |
| **Criterios de elección especificados** | Si | Si | Si | Si | Si | Si | Si | Si | Si | Si | Si | Si | Si |
| **Asignación aleatoria** | Si | Si | Si | Si | Si | Si | Si | Si | Si | Si | Si | Si | Si |
| **Ocultación**  **de la asignación** | No | No | Si | No | No | Si | Si | No | No | No | Si | Si | Si |
| **Grupos homogéneos**  **al inicio** | No | Si | Si | Si | Si | Si | Si | Si | Si | Si | Si | No | Si |
| **Cegamiento de los participantes** | Si | Si | Si | Si | Si | Si | Si | Si | Si | Si | Si | Si | Si |
| **Cegamiento de los terapeutas** | No | No | No | No | No | Si | No | No | Si | No | Si | No | No |
| **Cegamiento**  **de los evaluadores** | No | No | No | No | No | Si | Si | No | Si | No | Si | No | Si |
| **Seguimiento adecuado** | Si | Si | Si | Si | Si | Si | Si | Si | Si | Si | Si | Si | Si |
| **Análisis**  **por**  **intención**  **de tratar** | Si | Si | Si | Si | Si | No | No | Si | Si | Si | No | No | No |
| **Comparación entre grupos** | Si | Si | Si | Si | Si | Si | Si | Si | Si | Si | Si | Si | Si |
| **Variabilidad y puntos estimados** | Si | Si | Si | Si | Si | Si | Si | Si | Si | Si | Si | Si | Si |
| Total  (sobre 10) | 6/10 | 7/10 | 8/10 | 7/10 | 7/10 | 9/10 | 8/10 | 7/10 | 9/10 | 7/10 | 9/10 | 6/10 | 8/10 |
| Material Online 2 |  |  |  |  |  |  |  |  |  |  |  |  |  |
